# Supplementary material for: Identification of ferroptosis genes in immune infiltration and prognosis in thyroid papillary carcinoma using network analysis
Source: BMC Genomics. 2021 Jul 27;22:576. doi: 10.1186/s12864-021-07895-6 (PMC8314640; doi:10.1186/s12864-021-07895-6)
Supplement: Supplementary file 2 — Additional file 2: Table S2. The comparison of immune cell contents identified in the two subtypes. [file 12864_2021_7895_MOESM2_ESM.xlsx]

## Sheet: Sheet1
KEGG_pathway	logFC	AveExpr	t	P.Value	adj.P.Val	B
KEGG_BUTANOATE_METABOLISM	0.608513	-0.0376827	19.3579	3.06e-63	5.68e-61	133.228
KEGG_LIMONENE_AND_PINENE_DEGRADATION	0.713766	-0.0603028	18.5066	4.32e-59	4.02e-57	123.732
KEGG_PROPANOATE_METABOLISM	0.608006	-0.0418585	17.8167	9.37e-56	5.81e-54	116.099
KEGG_VALINE_LEUCINE_AND_ISOLEUCINE_DEGRADATION	0.570758	-0.0282736	17.4369	6.25e-54	2.91e-52	111.925
KEGG_CELL_ADHESION_MOLECULES_CAMS	-0.552266	0.0295454	-17.2583	4.47e-53	1.66e-51	109.971
KEGG_JAK_STAT_SIGNALING_PATHWAY	-0.459203	0.0195291	-17.0069	7.07e-52	2.19e-50	107.229
KEGG_VIRAL_MYOCARDITIS	-0.581862	0.0200882	-16.9341	1.57e-51	4.17e-50	106.437
KEGG_LEUKOCYTE_TRANSENDOTHELIAL_MIGRATION	-0.444724	0.0248308	-16.0156	3.35e-47	7.79e-46	96.5339
KEGG_LYSINE_DEGRADATION	0.477056	-0.0232399	15.807	3.15e-46	6.5e-45	94.3092
KEGG_CYTOKINE_CYTOKINE_RECEPTOR_INTERACTION	-0.494905	0.0205675	-15.7879	3.86e-46	7.18e-45	94.1062
KEGG_PATHOGENIC_ESCHERICHIA_COLI_INFECTION	-0.506029	0.0150262	-15.732	7.02e-46	1.19e-44	93.512
KEGG_COMPLEMENT_AND_COAGULATION_CASCADES	-0.539036	0.0235157	-15.6195	2.33e-45	3.62e-44	92.3193
KEGG_ASCORBATE_AND_ALDARATE_METABOLISM	0.609254	-0.0411281	15.4074	2.23e-44	3.19e-43	90.0776
KEGG_BETA_ALANINE_METABOLISM	0.496838	-0.0370088	15.3027	6.77e-44	8.99e-43	88.9753
KEGG_SYSTEMIC_LUPUS_ERYTHEMATOSUS	-0.647043	0.0137639	-15.0839	6.82e-43	8.46e-42	86.6814
KEGG_FATTY_ACID_METABOLISM	0.46476	-0.0298562	14.9288	3.48e-42	4.05e-41	85.0634
KEGG_PROTEIN_EXPORT	0.498062	-0.0411909	14.1882	7.61e-39	8.32e-38	77.4297
KEGG_NATURAL_KILLER_CELL_MEDIATED_CYTOTOXICITY	-0.436231	0.00522205	-14.1345	1.32e-38	1.36e-37	76.8826
KEGG_TASTE_TRANSDUCTION	-0.369931	0.0397666	-14.08	2.31e-38	2.26e-37	76.3285
KEGG_NOD_LIKE_RECEPTOR_SIGNALING_PATHWAY	-0.393109	0.0133156	-13.9537	8.39e-38	7.8e-37	75.0474
KEGG_ARRHYTHMOGENIC_RIGHT_VENTRICULAR_CARDIOMYOPATHY_ARVC	-0.392006	0.0136601	-13.5964	3.14e-36	2.78e-35	71.4531
KEGG_LEISHMANIA_INFECTION	-0.485665	0.00342059	-13.4875	9.39e-36	7.94e-35	70.3664
KEGG_ASTHMA	-0.710795	3.68e-05	-13.3512	3.68e-35	2.97e-34	69.0121
KEGG_AXON_GUIDANCE	-0.347799	0.00544462	-13.2149	1.43e-34	1.11e-33	67.6641
KEGG_PORPHYRIN_AND_CHLOROPHYLL_METABOLISM	0.43905	-0.0441058	13.1129	3.94e-34	2.93e-33	66.6598
KEGG_ALLOGRAFT_REJECTION	-0.673023	-0.00722873	-13.1084	4.11e-34	2.94e-33	66.6162
KEGG_TERPENOID_BACKBONE_BIOSYNTHESIS	0.489869	-0.0276129	12.9269	2.47e-33	1.7e-32	64.8389
KEGG_GRAFT_VERSUS_HOST_DISEASE	-0.656551	-0.0027707	-12.9165	2.73e-33	1.82e-32	64.7379
KEGG_APOPTOSIS	-0.357956	0.00754693	-12.8232	6.83e-33	4.38e-32	63.8299
KEGG_INTESTINAL_IMMUNE_NETWORK_FOR_IGA_PRODUCTION	-0.57512	-0.00484787	-12.8062	8.07e-33	4.85e-32	63.6648
KEGG_PEROXISOME	0.353746	-0.0179728	12.8059	8.09e-33	4.85e-32	63.6623
KEGG_HEMATOPOIETIC_CELL_LINEAGE	-0.475934	0.0125068	-12.7508	1.39e-32	8.06e-32	63.128
KEGG_ECM_RECEPTOR_INTERACTION	-0.403188	0.0184045	-12.7005	2.27e-32	1.28e-31	62.6406
KEGG_TYPE_I_DIABETES_MELLITUS	-0.606375	-0.0050183	-12.6888	2.54e-32	1.39e-31	62.5274
KEGG_CHEMOKINE_SIGNALING_PATHWAY	-0.36207	0.0190766	-12.5584	9.01e-32	4.79e-31	61.2717
KEGG_GLYCINE_SERINE_AND_THREONINE_METABOLISM	0.38505	-0.00644629	12.4755	2.01e-31	1.04e-30	60.4767
KEGG_PYRUVATE_METABOLISM	0.399189	-0.0431538	12.1978	2.89e-30	1.45e-29	57.8336
KEGG_AUTOIMMUNE_THYROID_DISEASE	-0.590858	-0.00532904	-12.1283	5.61e-30	2.74e-29	57.1771
KEGG_REGULATION_OF_ACTIN_CYTOSKELETON	-0.319216	0.0105367	-11.8818	5.77e-29	2.75e-28	54.8668
KEGG_NEUROACTIVE_LIGAND_RECEPTOR_INTERACTION	-0.316259	0.0210488	-11.431	3.83e-27	1.78e-26	50.7119
KEGG_MATURITY_ONSET_DIABETES_OF_THE_YOUNG	0.506269	0.0202908	11.3245	1.02e-26	4.61e-26	49.7449
KEGG_ARACHIDONIC_ACID_METABOLISM	-0.327086	0.0356626	-11.1792	3.82e-26	1.69e-25	48.4329
KEGG_P53_SIGNALING_PATHWAY	-0.339108	0.00181497	-11.1255	6.22e-26	2.69e-25	47.9513
KEGG_PARKINSONS_DISEASE	0.431764	-0.0361658	10.9655	2.63e-25	1.11e-24	46.5231
KEGG_TOLL_LIKE_RECEPTOR_SIGNALING_PATHWAY	-0.329678	0.00897817	-10.9572	2.83e-25	1.17e-24	46.4498
KEGG_REGULATION_OF_AUTOPHAGY	0.376844	-0.00888796	10.9131	4.21e-25	1.7e-24	46.0584
KEGG_CITRATE_CYCLE_TCA_CYCLE	0.443951	-0.0347086	10.8772	5.8e-25	2.29e-24	45.7413
KEGG_GLYCOSYLPHOSPHATIDYLINOSITOL_GPI_ANCHOR_BIOSYNTHESIS	0.370436	-0.00677514	10.8394	8.13e-25	3.15e-24	45.4069
KEGG_OXIDATIVE_PHOSPHORYLATION	0.442375	-0.039391	10.7324	2.1e-24	7.98e-24	44.4659
KEGG_FC_GAMMA_R_MEDIATED_PHAGOCYTOSIS	-0.305498	0.00414705	-10.6914	3.02e-24	1.12e-23	44.1072
KEGG_ADHERENS_JUNCTION	-0.339232	0.00257337	-10.5034	1.58e-23	5.75e-23	42.4732
KEGG_HUNTINGTONS_DISEASE	0.317299	-0.0303206	10.4744	2.03e-23	7.26e-23	42.2228
KEGG_TIGHT_JUNCTION	-0.280751	2.84e-05	-10.45	2.51e-23	8.81e-23	42.0125
KEGG_ANTIGEN_PROCESSING_AND_PRESENTATION	-0.401035	-0.00443381	-10.4057	3.69e-23	1.27e-22	41.6307
KEGG_PATHWAYS_IN_CANCER	-0.249377	0.00575105	-10.1622	3.01e-22	1.02e-21	39.5554
KEGG_TRYPTOPHAN_METABOLISM	0.315126	0.00850895	10.1016	5.05e-22	1.68e-21	39.0441
KEGG_T_CELL_RECEPTOR_SIGNALING_PATHWAY	-0.294406	0.00110203	-9.8098	5.94e-21	1.94e-20	36.6094
KEGG_CARDIAC_MUSCLE_CONTRACTION	0.335567	-0.0244981	9.75061	9.73e-21	3.08e-20	36.1216
KEGG_VALINE_LEUCINE_AND_ISOLEUCINE_BIOSYNTHESIS	0.406778	-0.0435789	9.75018	9.76e-21	3.08e-20	36.1181
KEGG_PRIMARY_IMMUNODEFICIENCY	-0.426536	-0.0253132	-9.68425	1.69e-20	5.23e-20	35.5772
KEGG_HYPERTROPHIC_CARDIOMYOPATHY_HCM	-0.276453	0.0148666	-9.67248	1.86e-20	5.67e-20	35.4808
KEGG_FOCAL_ADHESION	-0.270201	0.00787837	-9.6603	2.06e-20	6.17e-20	35.3813
KEGG_AMINOACYL_TRNA_BIOSYNTHESIS	0.360573	-0.025494	9.55624	4.85e-20	1.43e-19	34.5341
KEGG_DILATED_CARDIOMYOPATHY	-0.263368	0.0226573	-9.10486	1.86e-18	5.41e-18	30.9347
KEGG_GLYCEROLIPID_METABOLISM	0.244308	-0.000221933	9.03797	3.16e-18	9.04e-18	30.412
KEGG_RETINOL_METABOLISM	0.285213	0.00865523	8.93271	7.24e-18	2.04e-17	29.5951
KEGG_N_GLYCAN_BIOSYNTHESIS	0.270828	-0.0102594	8.92162	7.89e-18	2.19e-17	29.5094
KEGG_MAPK_SIGNALING_PATHWAY	-0.208434	0.00709535	-8.74037	3.23e-17	8.83e-17	28.1205
KEGG_NOTCH_SIGNALING_PATHWAY	-0.237648	0.00019765	-8.34299	6.59e-16	1.78e-15	25.1503
KEGG_SMALL_CELL_LUNG_CANCER	-0.234623	0.000138205	-8.26184	1.2e-15	3.2e-15	24.5567
KEGG_B_CELL_RECEPTOR_SIGNALING_PATHWAY	-0.249534	-0.00389715	-8.17966	2.21e-15	5.78e-15	23.96
KEGG_ALZHEIMERS_DISEASE	0.250823	-0.0249149	7.97526	9.78e-15	2.53e-14	22.496
KEGG_ETHER_LIPID_METABOLISM	-0.219825	0.0442381	-7.93603	1.3e-14	3.3e-14	22.2183
KEGG_ARGININE_AND_PROLINE_METABOLISM	0.22146	-0.00485239	7.69268	7.3e-14	1.84e-13	20.5199
KEGG_CIRCADIAN_RHYTHM_MAMMAL	-0.308174	-0.00214199	-7.668	8.68e-14	2.15e-13	20.35
KEGG_CYTOSOLIC_DNA_SENSING_PATHWAY	-0.223793	-0.00232844	-7.63396	1.1e-13	2.69e-13	20.1164
KEGG_VIBRIO_CHOLERAE_INFECTION	0.227002	-0.0150793	7.62011	1.21e-13	2.93e-13	20.0215
KEGG_CELL_CYCLE	-0.218103	-0.00436833	-7.5455	2.04e-13	4.85e-13	19.5132
KEGG_PRION_DISEASES	-0.227809	0.0258964	-7.39996	5.53e-13	1.3e-12	18.5329
KEGG_PRIMARY_BILE_ACID_BIOSYNTHESIS	0.284805	-0.0183083	7.34758	7.89e-13	1.83e-12	18.1839
KEGG_TAURINE_AND_HYPOTAURINE_METABOLISM	-0.289228	0.0282972	-7.21338	1.95e-12	4.47e-12	17.2989
KEGG_GLYCOSAMINOGLYCAN_DEGRADATION	-0.251375	-0.0144302	-7.06118	5.33e-12	1.21e-11	16.3114
KEGG_ONE_CARBON_POOL_BY_FOLATE	-0.27216	-0.00493264	-7.02761	6.64e-12	1.49e-11	16.096
KEGG_LINOLEIC_ACID_METABOLISM	-0.219208	0.0818487	-6.84786	2.13e-11	4.71e-11	14.9567
KEGG_FC_EPSILON_RI_SIGNALING_PATHWAY	-0.189243	0.0126187	-6.83999	2.24e-11	4.89e-11	14.9073
KEGG_ALDOSTERONE_REGULATED_SODIUM_REABSORPTION	-0.20731	0.0189709	-6.80966	2.71e-11	5.87e-11	14.7177
KEGG_O_GLYCAN_BIOSYNTHESIS	-0.230404	0.0241039	-6.78133	3.25e-11	6.95e-11	14.5412
KEGG_BLADDER_CANCER	-0.206838	0.000149643	-6.70637	5.23e-11	1.1e-10	14.0772
KEGG_CHRONIC_MYELOID_LEUKEMIA	-0.204371	-0.00156719	-6.64779	7.55e-11	1.58e-10	13.7176
KEGG_BASAL_CELL_CARCINOMA	-0.184468	0.0156779	-6.3526	4.63e-10	9.58e-10	11.9462
KEGG_DNA_REPLICATION	-0.259724	-0.00494354	-6.28807	6.83e-10	1.4e-09	11.5681
KEGG_RENIN_ANGIOTENSIN_SYSTEM	-0.237839	0.0368204	-6.14025	1.64e-09	3.32e-09	10.7145
KEGG_SELENOAMINO_ACID_METABOLISM	0.191635	-0.00343756	6.11787	1.87e-09	3.74e-09	10.5868
KEGG_ENDOCYTOSIS	-0.158453	-0.00324995	-6.10399	2.03e-09	4.01e-09	10.5078
KEGG_GLYCOSAMINOGLYCAN_BIOSYNTHESIS_KERATAN_SULFATE	-0.221423	-0.00185814	-5.98768	3.98e-09	7.79e-09	9.85202
KEGG_RIG_I_LIKE_RECEPTOR_SIGNALING_PATHWAY	-0.162656	0.00105865	-5.96155	4.62e-09	8.95e-09	9.70617
KEGG_MELANOMA	-0.175413	0.0140129	-5.9551	4.8e-09	9.19e-09	9.67024
KEGG_VASOPRESSIN_REGULATED_WATER_REABSORPTION	0.181442	-0.00297323	5.94388	5.11e-09	9.7e-09	9.60786
KEGG_HOMOLOGOUS_RECOMBINATION	-0.209053	-0.0148941	-5.89922	6.59e-09	1.24e-08	9.36052
KEGG_ACUTE_MYELOID_LEUKEMIA	-0.175004	-0.000762733	-5.78569	1.25e-08	2.33e-08	8.73914
KEGG_PANCREATIC_CANCER	-0.173493	0.00603188	-5.73278	1.68e-08	3.09e-08	8.45317
KEGG_RNA_POLYMERASE	0.185387	-0.028179	5.7057	1.95e-08	3.56e-08	8.30771
KEGG_SNARE_INTERACTIONS_IN_VESICULAR_TRANSPORT	0.164161	-0.0182651	5.67609	2.3e-08	4.14e-08	8.14936
KEGG_GLYCOLYSIS_GLUCONEOGENESIS	0.197891	-0.0174775	5.57972	3.89e-08	6.95e-08	7.63901
KEGG_TYROSINE_METABOLISM	0.164202	-0.00970366	5.56214	4.27e-08	7.57e-08	7.54674
KEGG_PANTOTHENATE_AND_COA_BIOSYNTHESIS	0.192706	0.024242	5.26922	2.01e-07	3.53e-07	6.04764
KEGG_LYSOSOME	-0.158976	0.00162374	-5.18923	3.03e-07	5.28e-07	5.6509
KEGG_GLYCOSPHINGOLIPID_BIOSYNTHESIS_LACTO_AND_NEOLACTO_SERIES	-0.176615	0.0171073	-5.10281	4.7e-07	8.1e-07	5.22838
KEGG_AMYOTROPHIC_LATERAL_SCLEROSIS_ALS	-0.143896	-0.00115317	-5.0389	6.48e-07	1.11e-06	4.92007
KEGG_NON_HOMOLOGOUS_END_JOINING	-0.214361	-0.00526317	-5.02715	6.87e-07	1.16e-06	4.86379
KEGG_NICOTINATE_AND_NICOTINAMIDE_METABOLISM	0.153283	0.0287619	4.90797	1.23e-06	2.07e-06	4.29949
KEGG_VEGF_SIGNALING_PATHWAY	-0.131669	0.00934281	-4.81672	1.92e-06	3.19e-06	3.87577
KEGG_NEUROTROPHIN_SIGNALING_PATHWAY	-0.133217	-0.000819764	-4.72879	2.91e-06	4.8e-06	3.47437
KEGG_EPITHELIAL_CELL_SIGNALING_IN_HELICOBACTER_PYLORI_INFECTION	-0.130417	0.00488051	-4.63277	4.57e-06	7.45e-06	3.04379
KEGG_PPAR_SIGNALING_PATHWAY	0.119135	0.0154786	4.54308	6.9e-06	1.12e-05	2.64892
KEGG_MTOR_SIGNALING_PATHWAY	0.131695	-0.00631267	4.54138	6.96e-06	1.12e-05	2.64151
KEGG_FRUCTOSE_AND_MANNOSE_METABOLISM	0.134481	-0.00417338	4.03376	6.31e-05	9.98e-05	0.54283
KEGG_GLYOXYLATE_AND_DICARBOXYLATE_METABOLISM	0.16743	-0.0173506	4.03319	6.33e-05	9.98e-05	0.540631
KEGG_GLYCOSPHINGOLIPID_BIOSYNTHESIS_GLOBO_SERIES	-0.156066	-0.00219314	-3.98396	7.75e-05	0.000121091	0.349489
KEGG_DRUG_METABOLISM_CYTOCHROME_P450	0.134052	0.00630136	3.92458	9.86e-05	0.00015281	0.121886
KEGG_INSULIN_SIGNALING_PATHWAY	0.104222	-0.011653	3.9091	0.00010493	0.000161297	0.0630655
KEGG_DORSO_VENTRAL_AXIS_FORMATION	-0.141831	0.00415094	-3.90535	0.000106522	0.000162402	0.0488618
KEGG_RIBOSOME	-0.216038	-0.0232919	-3.88441	0.000115849	0.000175187	-0.0302869
KEGG_GAP_JUNCTION	-0.113898	0.00435087	-3.83598	0.000140458	0.000210686	-0.211737
KEGG_ADIPOCYTOKINE_SIGNALING_PATHWAY	0.0944421	-0.00527572	3.58228	0.00037269	0.000554563	-1.12711
KEGG_GLYCOSPHINGOLIPID_BIOSYNTHESIS_GANGLIO_SERIES	-0.136273	-0.012309	-3.46884	0.000566189	0.000835802	-1.51713
KEGG_GLIOMA	-0.105831	0.0096449	-3.38342	0.000770008	0.00112773	-1.8029
KEGG_LONG_TERM_POTENTIATION	0.0968279	0.00706482	3.25085	0.00122532	0.00178055	-2.23291
KEGG_OLFACTORY_TRANSDUCTION	0.0988654	0.00788317	3.22748	0.00132779	0.00191448	-2.30701
KEGG_CALCIUM_SIGNALING_PATHWAY	-0.0799112	0.0216176	-3.12478	0.00187897	0.00268836	-2.62652
KEGG_PENTOSE_PHOSPHATE_PATHWAY	0.115988	0.00322317	3.09324	0.00208645	0.00296244	-2.72262
KEGG_ERBB_SIGNALING_PATHWAY	-0.0916709	0.0014181	-3.04473	0.00244714	0.00344825	-2.86865
KEGG_BIOSYNTHESIS_OF_UNSATURATED_FATTY_ACIDS	0.108753	-0.00983856	3.03884	0.00249463	0.00348873	-2.88623
KEGG_LONG_TERM_DEPRESSION	-0.0835482	0.012897	-3.01625	0.00268475	0.00372659	-2.95335
KEGG_SPHINGOLIPID_METABOLISM	-0.09969	-0.00790152	-2.99943	0.00283475	0.00390565	-3.00299
KEGG_GLYCOSAMINOGLYCAN_BIOSYNTHESIS_CHONDROITIN_SULFATE	-0.11031	-0.0176937	-2.99614	0.00286496	0.00391825	-3.01267
KEGG_THYROID_CANCER	-0.0934401	0.00611	-2.93044	0.003534	0.00479798	-3.20386
KEGG_RENAL_CELL_CARCINOMA	-0.0916249	0.00626198	-2.89145	0.00399547	0.0053852	-3.31536
KEGG_NITROGEN_METABOLISM	-0.0860684	0.0248178	-2.86899	0.0042856	0.00573468	-3.37894
KEGG_COLORECTAL_CANCER	-0.0849166	0.00366643	-2.83918	0.00470029	0.00624467	-3.46259
KEGG_TGF_BETA_SIGNALING_PATHWAY	-0.0839292	0.00486669	-2.82148	0.00496343	0.0065475	-3.51186
KEGG_TYPE_II_DIABETES_MELLITUS	0.0833834	-0.0014622	2.72083	0.00673042	0.00877899	-3.78633
KEGG_DRUG_METABOLISM_OTHER_ENZYMES	-0.0917244	-0.00445571	-2.71989	0.00674944	0.00877899	-3.78886
KEGG_RNA_DEGRADATION	0.0783466	-0.00922283	2.58529	0.0100014	0.0129185	-4.14062
KEGG_PROSTATE_CANCER	-0.0745757	-0.00700004	-2.56005	0.0107478	0.0137868	-4.20464
KEGG_CYSTEINE_AND_METHIONINE_METABOLISM	0.0814793	0.00477848	2.54218	0.0113059	0.0144034	-4.2496
KEGG_STARCH_AND_SUCROSE_METABOLISM	0.0900676	0.00898597	2.5107	0.0123522	0.0156293	-4.32806
KEGG_STEROID_HORMONE_BIOSYNTHESIS	-0.0780259	0.0150299	-2.50319	0.012614	0.0158528	-4.34663
KEGG_FOLATE_BIOSYNTHESIS	0.108429	-0.0173493	2.43204	0.0153512	0.0191633	-4.51993
KEGG_PENTOSE_AND_GLUCURONATE_INTERCONVERSIONS	0.101565	0.00452779	2.40334	0.0165958	0.0205788	-4.58844
KEGG_GNRH_SIGNALING_PATHWAY	-0.058903	0.0202468	-2.28185	0.0229026	0.0282111	-4.86969
KEGG_ENDOMETRIAL_CANCER	-0.0733211	0.00811839	-2.22525	0.0264939	0.0324201	-4.99583
KEGG_NUCLEOTIDE_EXCISION_REPAIR	-0.0728422	-0.0089917	-2.20027	0.0282279	0.0343162	-5.05051
KEGG_BASE_EXCISION_REPAIR	-0.068121	-0.0125145	-2.12829	0.0337839	0.040804	-5.20469
KEGG_BASAL_TRANSCRIPTION_FACTORS	0.0692095	-0.0119099	2.07692	0.0383006	0.0459607	-5.31164
KEGG_ABC_TRANSPORTERS	0.0621704	0.00453431	2.05739	0.0401483	0.0478691	-5.35163
