# Supplementary material for: Identification of ferroptosis genes in immune infiltration and prognosis in thyroid papillary carcinoma using network analysis
Source: BMC Genomics. 2021 Jul 27;22:576. doi: 10.1186/s12864-021-07895-6 (PMC8314640; doi:10.1186/s12864-021-07895-6)
Supplement: Supplementary file 3 — Additional file 3: Fig. S1. Co-expression analysis of 1747 immune genes in the TCGA cohort. (A) Calculation of the scale-free fit index of various soft-thresholding powers and the analysis of the mean connectivity of various soft-thresholding powers. (B) Median rank and Z-summary statistics in the module preservation process. The plot shows the module position in the test dataset based on the Median rank(left). The plot illustrates the analysis of the Z-summary between different modules in the test dataset(right). (C) Heatmap of module trait relationships between gene modules and traits of THCA. The correlation coefficient in each cell represents the correlation between the modules and traits, which increases in size from blue to red. The corresponding P-value is annotated. The module–trait relationships were demonstrated by correlation values and P-values (In parenthesis) with a range of colors; the degree of correlation between modules and clinical features is shown. Rows are module eigengene (ME) regards to each module, and the columns indicate traits. [file 12864_2021_7895_MOESM3_ESM.xlsx]

## Sheet: Sheet1
Paramater	Overall	Cluster1	Cluster2	p-value
n	502	383	119
Activated_B_cell (median [IQR])	-0.16 [-0.26, -0.05]	-0.13 [-0.23, -0.01]	-0.26 [-0.32, -0.17]	<0.001
Activated_CD4_T_cell (median [IQR])	-0.04 [-0.10, 0.03]	-0.02 [-0.07, 0.06]	-0.13 [-0.18, -0.08]	<0.001
Activated_CD8_T_cell (median [IQR])	0.11 [0.05, 0.19]	0.13 [0.08, 0.23]	0.03 [0.00, 0.08]	<0.001
Central_memory_CD4_T_cell (median [IQR])	0.45 [0.41, 0.48]	0.46 [0.44, 0.48]	0.39 [0.38, 0.40]	<0.001
Central_memory_CD8_T_cell (median [IQR])	0.33 [0.30, 0.36]	0.34 [0.31, 0.36]	0.30 [0.28, 0.33]	<0.001
Effector_memeory_CD4_T_cell (median [IQR])	0.17 [0.15, 0.19]	0.17 [0.16, 0.19]	0.15 [0.13, 0.16]	<0.001
Effector_memeory_CD8_T_cell (median [IQR])	0.11 [0.05, 0.17]	0.13 [0.09, 0.18]	0.02 [-0.02, 0.05]	<0.001
Gamma_delta_T_cell (median [IQR])	0.22 [0.18, 0.25]	0.23 [0.21, 0.26]	0.16 [0.14, 0.19]	<0.001
Immature__B_cell (median [IQR])	-0.01 [-0.07, 0.06]	0.02 [-0.03, 0.08]	-0.11 [-0.15, -0.06]	<0.001
Memory_B_cell (median [IQR])	0.09 [0.03, 0.14]	0.11 [0.06, 0.15]	-0.01 [-0.07, 0.05]	<0.001
Regulatory_T_cell (median [IQR])	0.05 [-0.05, 0.14]	0.09 [0.02, 0.16]	-0.10 [-0.15, -0.05]	<0.001
T_follicular_helper_cell (median [IQR])	0.18 [0.15, 0.21]	0.19 [0.17, 0.22]	0.14 [0.10, 0.16]	<0.001
Type_1_T_helper_cell (median [IQR])	0.06 [0.03, 0.10]	0.07 [0.04, 0.12]	0.03 [0.00, 0.05]	<0.001
Type_17_T_helper_cell (median [IQR])	0.05 [0.03, 0.08]	0.06 [0.04, 0.08]	0.02 [-0.01, 0.05]	<0.001
Type_2_T_helper_cell (median [IQR])	0.01 [-0.02, 0.04]	0.02 [-0.01, 0.04]	-0.02 [-0.04, 0.00]	<0.001
Activated_dendritic_cell (median [IQR])	0.28 [0.25, 0.31]	0.29 [0.26, 0.32]	0.25 [0.22, 0.26]	<0.001
CD56bright_natural_killer_cell (median [IQR])	0.29 [0.28, 0.31]	0.30 [0.28, 0.31]	0.28 [0.27, 0.30]	<0.001
CD56dim_natural_killer_cell (median [IQR])	0.36 [0.33, 0.38]	0.37 [0.35, 0.38]	0.31 [0.28, 0.33]	<0.001
Eosinophil (median [IQR])	-0.01 [-0.07, 0.05]	-0.01 [-0.07, 0.05]	-0.02 [-0.10, 0.05]	0.204
Immature_dendritic_cell (median [IQR])	0.44 [0.41, 0.46]	0.45 [0.43, 0.47]	0.39 [0.37, 0.42]	<0.001
Macrophage (median [IQR])	-0.04 [-0.10, 0.02]	-0.02 [-0.06, 0.03]	-0.13 [-0.16, -0.09]	<0.001
Mast_cell (median [IQR])	0.01 [-0.04, 0.07]	0.03 [-0.01, 0.08]	-0.07 [-0.10, -0.03]	<0.001
MDSC (median [IQR])	0.14 [0.04, 0.25]	0.18 [0.09, 0.28]	-0.01 [-0.07, 0.08]	<0.001
Monocyte (median [IQR])	0.39 [0.38, 0.40]	0.39 [0.38, 0.40]	0.39 [0.38, 0.40]	0.821
Natural_killer_cell (median [IQR])	0.31 [0.28, 0.33]	0.32 [0.30, 0.33]	0.26 [0.23, 0.28]	<0.001
Natural_killer_T_cell (median [IQR])	0.06 [0.02, 0.10]	0.08 [0.05, 0.11]	0.00 [-0.02, 0.04]	<0.001
Neutrophil (median [IQR])	0.04 [-0.03, 0.10]	0.06 [0.01, 0.11]	-0.05 [-0.12, 0.00]	<0.001
Plasmacytoid_dendritic_cell (median [IQR])	0.43 [0.41, 0.44]	0.43 [0.42, 0.44]	0.41 [0.40, 0.42]	<0.001
