# Supplementary material for: Identification of ferroptosis genes in immune infiltration and prognosis in thyroid papillary carcinoma using network analysis
Source: BMC Genomics. 2021 Jul 27;22:576. doi: 10.1186/s12864-021-07895-6 (PMC8314640; doi:10.1186/s12864-021-07895-6)
Supplement: Supplementary file 4 — Additional file 4: Table S3. The full list of significant differentially expressed genes. [file 12864_2021_7895_MOESM4_ESM.xlsx]

## Sheet: 814 genes
id
ATP2C2
ADH1B
AOX1
ARAP2
AC009237.16
AC007365.3
AIF1L
AGPAT4
ANGPTL1
BCL2L11
AC078899.3
ANKS1B
ART4
AC010226.4
AF186192.5
AC007743.1
BCL2
ARHGAP6
ANK2
ACACB
ARHGAP31-AS1
APOD
AP001271.3
ADAM33
AMD1
ART5
AGR3
AC068138.1
ANKRD37
ARHGAP24
ATXN7L1
ADD3
AC008753.6
AC078899.4
ADAM22
ALDH1A1
AC011247.3
ARMC2
AC073130.3
ANO5
AC078842.3
AKR1E2
ANKRD27
AASS
AL358852.1
ADH5
AAK1
AP1S3
ABR
A2M-AS1
BBC3
ABI3BP
BMP1
ARFGAP3
AK7
AC078899.1
AHCYL2
ATP10D
BID
BAX
ADK
ATP5S
ANK3
ARL4A
ANKRD53
AP4S1
ABCC6P2
AC007191.4
AKAP12
AP001462.6
AC005082.12
ASTE1
AC018804.7
AKAP3
AVPR1A
AASDH
BCL11A
B3GALNT1
BEX1
BCL11B
ABHD17B
ARSK
ANKRD12
AGRN
ATF2
ARHGEF28
ATP5F1P5
BCAS2
AP000704.5
ANTXR1
BIN1
ALDH3B1
ANKDD1A
BAG2
ARL4D
ARHGEF5
AP1S1
B4GALNT2
ASPH
ADORA1
ATIC
AGPAT9
ANKRD46
ALG11
ATXN1L
ARHGAP23
AMOTL2
BLOC1S2
ATP8B2
ARHGEF34P
AZI2
ACTR5
ATM
ACOT7
AGTRAP
ALDH7A1
ARHGAP21
ANKRD18EP
ABCB10
BHLHB9
BBS7
AC006273.5
AC002451.3
ABLIM1
AP2M1
ATP1A1
AP001372.2
APBB2
AC046143.3
AC009473.1
AF186192.1
ADAM15
ARHGEF2
AC139100.4
ASAH1
AC079807.2
AC006159.5
BLOC1S5
ATG2B
ADPRHL2
ACTN4
AC005237.4
BLOC1S6
ARL14EP
BCL2L1
AP1M2
ARMCX1
ARL6
AC093642.3
ASAP3
ANAPC15
AC009237.11
BEX2
ALG12
ATP6V1B2
AC009237.8
ARPC5L
AAED1
AC104076.3
ATP13A3
AC079305.10
AVEN
B3GAT1
ARPC3
AC002064.4
AP2A1
AC002066.1
ATG4C
B3GNT8
ACAP1
BAIAP2
B3GALT5
ABHD17C
BBS4
ABTB2
ARRDC2
AC079630.2
ADIPOR2
BANK1
AFAP1L2
ARHGEF4
APPL1
ANAPC16
BCAP29
BCKDK
ANXA9
B3GNT7
AC011242.6
AKAP8
AK1
ARMC8
AXIN1
AC010883.5
ARAP1
ANKS1A
AC009299.3
ATP6V0E2-AS1
ARID1B
ABCC3
ADO
AGO3
ARHGAP20
APLP2
AC008063.2
ABCC6P1
ANKRD9
ASB1
ABCA8
ARL6IP5
ATP6V1F
BANCR
ARF4
BCL6
ARL14
ACTN1
AC005076.5
ANKRD13D
AP4B1
ANAPC13
BLZF1
AGL
ANXA1
BDNF-AS
ATP6AP1
AMZ2P1
ATP1A1-AS1
ADAL
BLACAT1
AKIRIN1
ASF1B
BLOC1S4
APPBP2
ADNP2
AC009948.5
BAG6
ATXN7L3B
AP001258.4
AC142472.6
ATR
ATXN7
BCAR1
ACTRT3
BBOX1
ADRA1B
ARC
AQP1
ANKS6
ANKLE2
ALDH2
AMIGO2
BEX4
APOM
ACSM5
ACSS1
BAIAP3
ACSF2
ACADM
BCKDHB
APLNR
ARAP3
ACTR1A
AC093585.6
B4GALNT3
ASH1L
ACY1
AC018816.3
AC092171.4
AC006978.6
AC002310.14
ASCC3
ADHFE1
ADAMTS9
APC
BCL2L2
AC084125.4
ATAD2
ARRDC1
AFMID
ARHGDIB
BLNK
AF131216.5
AC079630.4
B3GNT3
AP5S1
AKAP10
AC108463.2
BLVRA
AC096669.2
APOBEC3H
AGR2
ARHGAP18
BICD1
AQP4
AGPAT2
ATP11A
BASP1
AMMECR1L
ALMS1
ATXN1
ANKIB1
ARMCX6
BHLHE40
ACADSB
ADCY10P1
AFG3L2
ARHGAP28
BFAR
B3GALT5-AS1
ATG9A
ADRM1
BEAN1
ACP2
BHLHE41
AC009005.2
APOBEC3B
ALKBH8
AKAP7
ARSG
AKIP1
ALDH9A1
ACKR3
B4GALT5
B4GALT3
BCAM
BDKRB2
ARHGAP27
ATP6V1G2
ALOX15B
ALDH1A3
ACVR1
AP4M1
ANKRD13C
ARNTL
ALS2
BIRC6
BDP1
AF131215.9
AR
BBIP1
ARHGEF16
AZIN1
AC010894.3
AC007255.8
ALDH1B1
AXIN2
ACTB
BIK
ALDH6A1
ADPRH
ARHGAP1
B4GALT2
ATF7IP2
ANXA6
B3GALT4
AMFR
ABCC1
B3GALNT2
ACOT11
AC009120.5
AHR
ALAD
ASB8
ANXA5
ANKRD49
ABHD13
ALG1L6P
ARL5A
BCLAF1
ADAP2
ACSL1
ATP6AP2
APEX2
ARHGEF3
ADAMTS10
ADAMTS5
ANXA2
ACP6
ARF5
ATP6V1H
ATP11C
AGPAT3
APOL3
ANKEF1
ARL2
ATXN10
BBS12
BCORL1
ASPHD1
AKIRIN2
BCRP3
AMOTL1
AUTS2
BBX
B4GALT6
AMOT
ASB7
ACOX1
ABHD5
BCCIP
ASXL1
ATP10A
B3GAT3
ABCF1
ACADL
BCDIN3D
AC010136.2
APTR
ATP2B1
AHNAK2
AGBL5
BIVM
ARMCX3
ASB13
ANKRD42
AGTR1
ATE1-AS1
ALDH18A1
AC139887.4
AF131215.8
ADIG
AL390877.1
AHCTF1
AC006033.22
AC034243.1
AIM2
ADM
AOAH
BICC1
ARHGEF15
ALOX5
ABCC6
ANKRD11
ADNP
ANKRD17
ACER2
ARID4A
ARMCX4
ARHGAP19
ATF3
AC006129.2
ARL8A
ACBD7
ANAPC2
ARHGEF19
AJ011932.1
AC079767.4
ARL3
AIP
ABHD11-AS1
BAZ1A
ATG13
AC026471.6
ARPC4
ABLIM2
ATG5
ABL1
B3GALT6
ANKRD52
ARSJ
AC245100.1
AC074212.6
BCL7A
AEN
BHLHA15
AC008940.1
BANF1
AGTPBP1
AFTPH
ADAMTSL2
BCAS4
ANKH
ABCC4
AP5M1
ABLIM3
BEX5
ARHGAP39
ARFIP2
ATG14
AGPAT1
ATRX
ACN9
AC073464.7
ASNSD1
AC109309.4
ADAMTS14
AC024560.3
ABCB8
ARHGAP17
ARHGEF11
ANXA11
AP1AR
APOE
ATP8A1
ARL2BP
BCL10
ACSL5
AC007383.3
ADAM10
ANGPTL4
ANTXR2
AAGAB
ARHGAP25
ADSS
ADRBK2
ATF7
APLN
ADIRF-AS1
APOL1
ATOH8
ABCA1
ATG3
AKAP17A
ARID4B
ACTG1
ACTR1B
AP000351.13
AQR
AK8
ANGEL2
ANXA2P2
ADCY9
BCL9
AE000661.37
AGPS
ARHGEF9
ANKFY1
ABI3
AC016747.3
ALS2CL
AE000661.50
ANKRD65
ARHGAP31
APBB1
ARNT
AC026202.3
ASGR1
AP3B1
AP3M1
ALG2
ALKBH5
ARL15
ARHGAP33
APAF1
ANKMY2
ABCF2
ACPP
BMI1
ARHGAP30
ALDH3A2
ARPC1B
ATF4
ACADS
ARRDC4
BCL3
ARIH2
AKR1A1
BCS1L
ACYP1
ASUN
ADARB1
ARMCX2
ASS1
ATE1
AC012123.1
AC109642.1
BAHCC1
ARPC2
ABHD8
BCAT1
ATMIN
ANXA3
ABO
ARHGEF38
ACO1
ACBD3
ACP5
ARID1A
ADAMDEC1
AC137932.5
ANKRD13A
BCAR3
ANO6
A2M
APOC1
ALG13
AAMP
ARMC1
ACAP3
ARHGEF7
APP
AC092580.4
ABTB1
AP1G1
ARHGEF35
ADTRP
BHMT2
ARHGAP9
ABCG1
AP2S1
APOBEC3D
ACBD5
ATOX1
AVPI1
ARHGEF6
ATP8B1
ADCY8
BGN
BCL2L12
ANGPTL2
AKAP1
ATP9A
ARID2
ANO10
AC002539.1
AKAP11
ACAA1
ABHD2
ATP13A4
ARHGAP5
ACTA2
ANO8
BAHD1
ABAT
APEX1
ARMC6
BMF
ABHD6
ACRBP
AFAP1
AGT
ANKRD28
AC016831.7
BET1
AC009120.3
AC072052.7
ATP5F1
ANGPT2
ADAP1
ACADVL
ARF3
ACOT9
APRT
AIG1
AC002467.7
ATP6V1G1
BLVRB
AKT1
BCL7C
B9D2
ATP6V0E2
ALOX5AP
AXL
ATP6V1C1
ARL13B
AMZ2
ARAF
AKAP9
ATG4A
B3GNT9
APBB1IP
ATP2A2
BCL6B
ATG2A
ATAD3A
ATP1B1
APLP1
BAI2
AC009506.1
ASNA1
APIP
AIFM2
ABHD11
BIN2
ACD
ARHGEF10
ATP13A1
ACOT8
AFF4
AP3S1
ATXN2L
ALYREF
ARPC5
AC005083.1
APEH
ABCG2
ACKR1
ATP13A2
ANKRD54
APOO
BCAP31
AKR7A2
AC093323.3
ACOX3
ASXL2
AES
ARSA
APOL2
ARFGAP2
APOC1P1
ARF6
ADM2
BLOC1S1
AAMDC
ANKRD40
ATXN7L3
ARHGDIA
AZIN2
ALG3
ATP6V1A
ABHD3
ABRACL
ACAT1
ACAD10
ARMC5
AHNAK
ABHD10
APOPT1
ATP5G1
ANKRD22
ATRN
ARPC1A
ATP6V1E1
ARL6IP6
BDH1
ALKBH7
APOOL
AQP5
ARHGAP35
AL450992.2
AIMP2
ACAD9
ALG5
BCR
AOC1
ATP1B3
ABCF3
ADPRM
BATF
ANAPC11
ADRBK1
BBS10
BCOR
AP000351.3
ATP6V0D1
ARL5B
ARHGAP36
ATN1
ARHGEF26
ARVCF
ABCE1
AQP3
AKT2
ANKRD50
ARL4C
ABCA7
ATP2C1
AGAP3
AC093838.4
ALDOC
AC107057.1
ACAA2
BAP1
AMBRA1
ARHGEF1
AARS
AATF
ATP2A3
AC144530.1
ATP5A1
AC093850.2
ABCA3
BICD2
BCL2A1
ADAMTS2
B2M
ALPL
AGGF1
AK2
ADIPOR1
AP1S2
BDH2
ARHGEF10L
AEBP1
ATG4B
AGPAT5
AUH
ARHGEF37
AREL1
ARL8B
BIRC3
BAG1
BACE1
ARRDC1-AS1
B4GALT7
ADAM12
ADAMTS1
ATAD1
AFAP1L1
B9D1
ARCN1
ARL16
ABHD14A
BIRC2
ANP32A
ATF7IP
API5
ABHD14B
ATF5
ASAP1
BCL9L
APCDD1
ACVR1B
A4GALT
ARPP19

## Sheet: Sheet1
id	HR	HR.95LL	HR.95HL	pvalue
AC093850.2	1.02492	1.00921	1.04086	0.001784
B4GALT2	1.05088	1.01785	1.08498	0.00231978
ALOX5AP	1.0136	1.0042	1.0231	0.0045111
ARPC1B	1.01051	1.00305	1.01802	0.00569496
APLP1	1.04407	1.01261	1.0765	0.00572917
AC008063.2	0.682206	0.514589	0.90442	0.00785403
ADRA1B	0.846645	0.747237	0.959277	0.00899135
B3GALT4	0.924212	0.871041	0.980629	0.00913352
BDH2	0.977241	0.960446	0.994329	0.00924136
AP1S1	1.01106	1.0026	1.01959	0.0102902
ANXA1	0.998866	0.998	0.999733	0.0103366
AC005083.1	0.930212	0.878295	0.985197	0.0135509
AEBP1	1.0028	1.0005	1.00511	0.0172249
ARRDC2	0.978623	0.9612	0.996361	0.018386
AC046143.3	0.710216	0.53313	0.946123	0.0193643
BCL3	1.01697	1.00249	1.03165	0.0214451
ADAMTS14	1.05152	1.0057	1.09943	0.0271087
AGTRAP	0.978437	0.959378	0.997875	0.0298635
AP001258.4	0.950994	0.908735	0.995218	0.0302628
ACAP3	1.09794	1.00855	1.19525	0.0310478
AC079630.2	0.986208	0.973809	0.998765	0.0314464
AIP	0.988799	0.978625	0.99908	0.0328047
ANO8	1.07227	1.00482	1.14424	0.0352774
ANGPTL2	1.01708	1.00116	1.03326	0.0353464
B2M	0.999667	0.999354	0.999979	0.0366995
AC079630.4	0.97958	0.960742	0.998787	0.0372963
ATXN2L	1.02541	1.00102	1.05038	0.0410213
B3GNT7	0.957336	0.917973	0.998386	0.0418161
AP1M2	0.993082	0.986463	0.999746	0.0418958
AC008940.1	0.804273	0.650879	0.993819	0.0436553
AC007255.8	0.949891	0.902997	0.999219	0.0465685
APOL1	0.989112	0.978492	0.999848	0.0468634
ARPC5L	0.95644	0.915227	0.99951	0.0475057
BAI2	1.02772	1.00029	1.05591	0.04762
APOE	0.999136	0.998277	0.999995	0.0488024

## Sheet: Sheet2
id	coef	HR	HR.95L	HR.95H	pvalue
AC008063.2	-0.42841	0.651546	0.4818	0.881095	0.005402
APOE	-0.00128	0.998717	0.997578	0.999857	0.02744
BCL3	0.027472	1.02785	1.01279	1.04314	0.000265
ACAP3	0.115047	1.12193	1.00895	1.24755	0.033631
ALOX5AP	0.019349	1.01954	1.01028	1.02888	3.21e-05
ATXN2L	0.030875	1.03136	1.00492	1.05849	0.019792
B2M	-0.0005	0.999498	0.999055	0.999942	0.026513
