# Supplementary material for: Identification of ferroptosis genes in immune infiltration and prognosis in thyroid papillary carcinoma using network analysis
Source: BMC Genomics. 2021 Jul 27;22:576. doi: 10.1186/s12864-021-07895-6 (PMC8314640; doi:10.1186/s12864-021-07895-6)
Supplement: Supplementary file 5 — Additional file 5: Table S4. The statistical results of Unicox and Multicox analysis. [file 12864_2021_7895_MOESM5_ESM.xlsx]

## Sheet: Sheet1
Parameters	Unicox				Multicox
	HR	CI.95LL	CI.95HL	pvalue	HR	CI.95LL	CI.95HL	pvalue
riskScore	1.00586	1.0037	1.00802	9.71e-08	1.00292	1.0008	1.00504	0.00698698
cluster	1.96208	0.677933	5.67866	0.213842	5.06607	0.914301	28.0707	0.0632541
age	1.16106	1.10199	1.22329	2.07e-08	1.14162	1.08101	1.20564	1.95e-06
gender	1.93051	0.698303	5.33703	0.204861	1.15883	0.294152	4.56524	0.833105
radiation	1.58579	0.511104	4.92022	0.424789	1.27536	0.335595	4.84677	0.721036
stage	2.41328	1.52957	3.80757	0.000152717	0.96978	0.361029	2.60498	0.951466
stage_T	2.43228	1.37089	4.31544	0.00237904	1.48645	0.579621	3.81205	0.4094
stage_M	0.857041	0.512005	1.4346	0.557246	0.613494	0.263814	1.42666	0.256497
stage_N	1.53407	0.752512	3.12734	0.238982	1.91855	0.795058	4.62966	0.147143
